# Supplementary material for: Anti-Aging Potential of Substance P-Based Hydrogel for Human Skin Longevity
Source: MDPI journal article supplement (doi:10.3390/ijms20184453), 2019-09-10
Supplement: s1 [file s1]

## **Supplemental information**

### **Supplementary materials and methods**

#### *In vitro skin irritation test of SP alone*

Keraskin<sup>®</sup>-FT was prepared using the same methods as in the original paper, before treating topically with 100 µl of SP (1-10 µg/ml SP in PBS) for 24 h at 37 °C. After washing with PBS and culturing for 48 h, the MTT assay was performed. For histological evaluation, tissue sections were stained with H&E. At least two independent experiments were performed.

#### *Skin absorption of SP alone in the reconstructed human epidermis tissues*

Topical skin absorption of SP alone (5 µg/ml SP in PBS) was evaluated on the reconstructed human epidermis tissue, keraskin<sup>®</sup>-FT. SP alone (100 µl) containing FITC-SP in PBS was added topically to the keraskin<sup>®</sup>-FT, and tissue sections were fixed overnight in ice cold 4% formaldehyde after the indicated time. Thereafter, these tissue samples were washed and immersed in 4.5% sucrose solution for 24 h followed by dehydration in 30% sucrose until deposition occurred. Cryosections (5 µm thickness) were obtained using a freezing microtome (Leica, Wetzlar, Germany). The skin sections were imaged under a fluorescence microscope (Nikon, Tokyo, Japan).

A

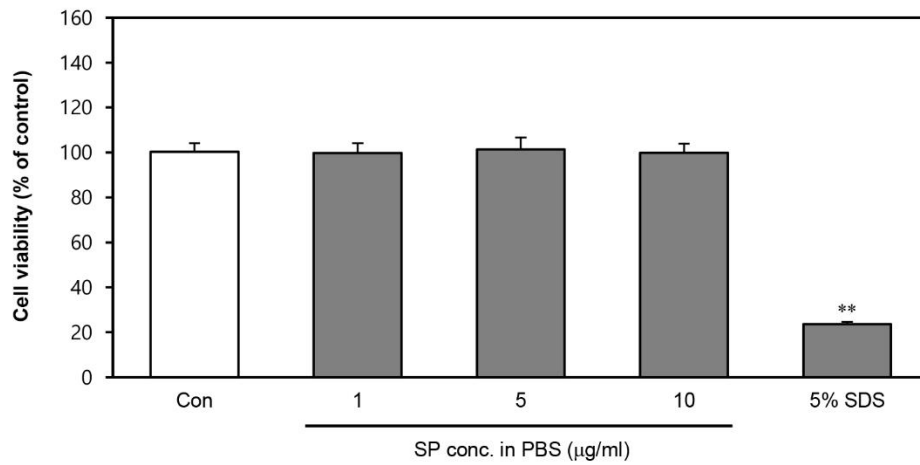

B

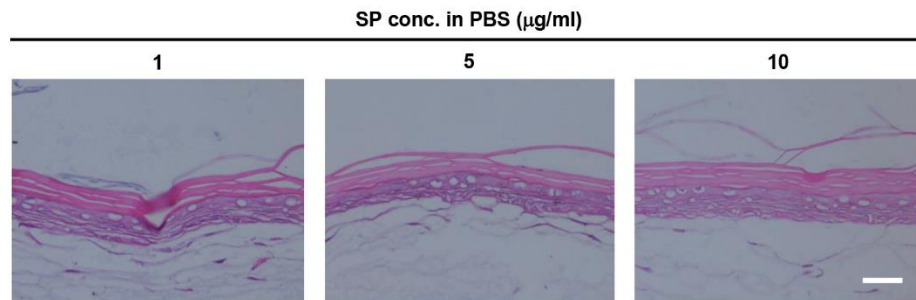

**Figure S1.** Effect of SP alone on the viability of in-vitro reconstructed 3D human skin (**A**) For tissue viability with SP alone, keraskin<sup>®</sup>-FT was treated with PBS (Con; control), SP alone (1-10 mg/ml), or 5% SDS for 24 h, and tissue viability was determined by MTT assay. (**B**) Histological examination was analyzed by evaluation of H&E staining. Values represent mean  $\pm$ SD of two independent experiments. Each value was compared with that of the control using student's *t*-test (\*\**P* < 0.01). Scale bar = 500  $\mu$ m. MTT, 3-(4,5-dimethylthiazol-2-yl)-2,5-diphenyl tetrazolium bromide; PBS, phosphate buffered saline; SDS, sodium dodecyl sulfate.

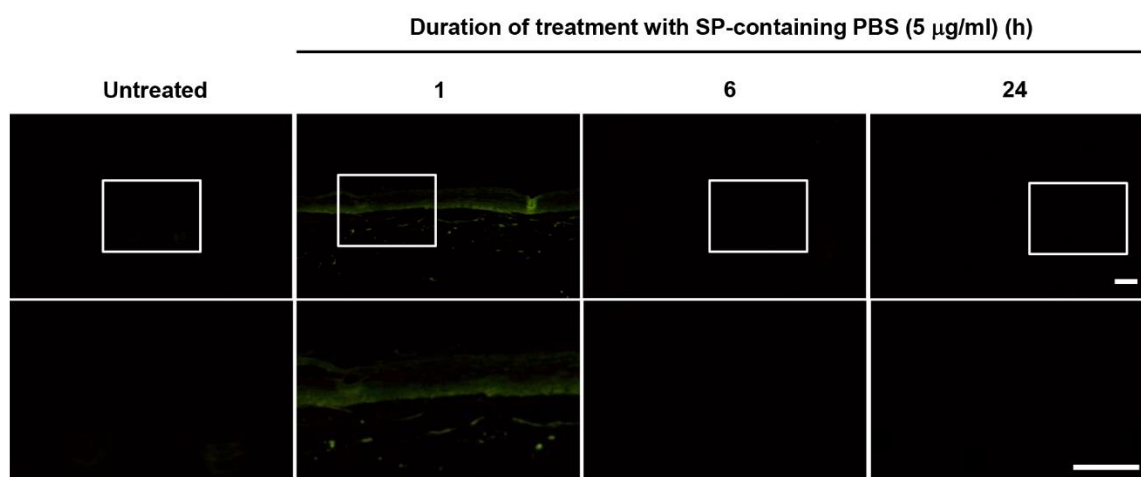

**Figure S2.** Skin absorption of SP alone into in-vitro reconstructed 3D human skin, keraskin<sup>®</sup>-FT. Fluorescence images demonstrate the skin absorption of SP alone. PBS (untreated) or SP alone (containing FITC-labeled SP in PBS) was topically applied for the indicated times. Frozen sections of skin tissues were obtained and observed by fluorescence microscopy. Scale bar = 1 mm. PBS, phosphate-buffered saline; FITC, fluorescein isothiocyanate.
